# Supplementary material
Source: PubMed Central journal article supplement (PMC9949532)
Supplement: NIHMS1816251-supplement-1.pdf [file NIHMS1816251-supplement-1.pdf]

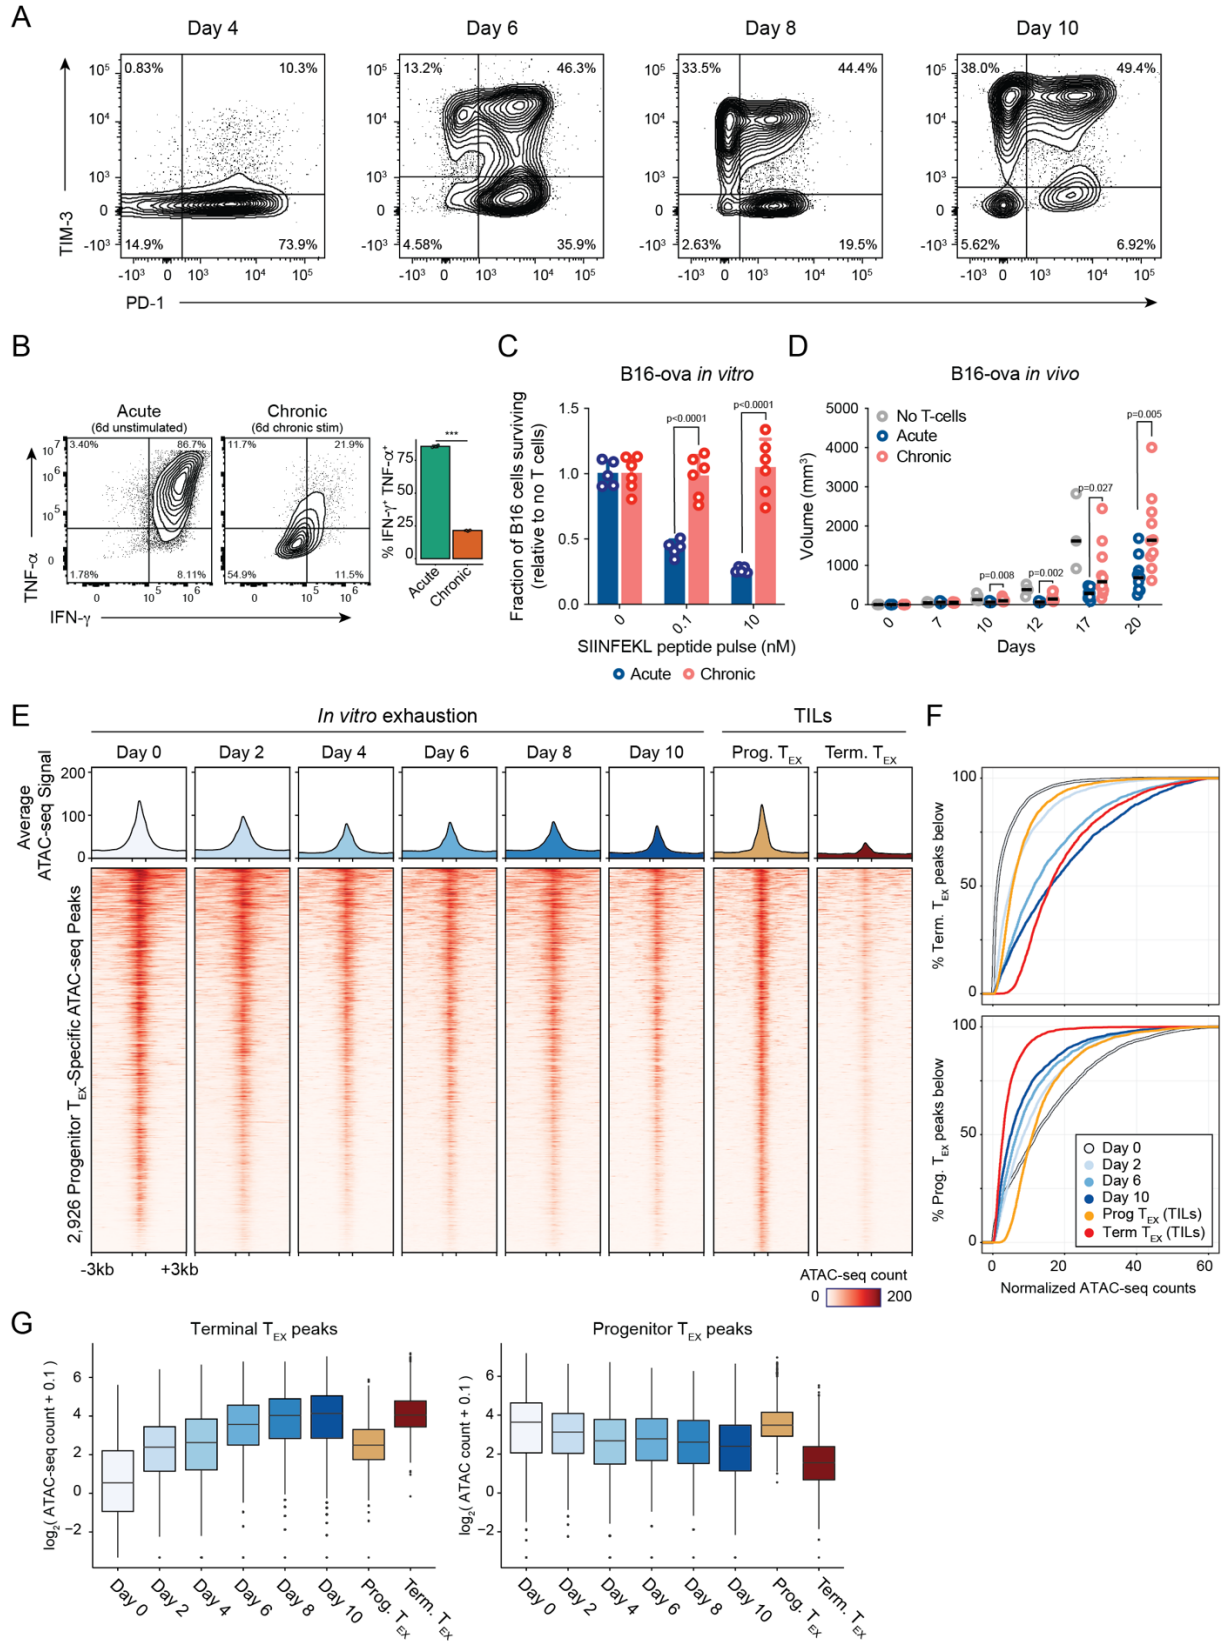

**Figure S1. Additional characterization of *in vitro* assay, related to Figure 1. (A)** Surface phenotype of chronically stimulated T cells throughout the *in vitro* exhaustion assay. **(B)** Effector cytokine production of

acutely (left) and chronically (right) stimulated T cells after 6 days of chronic stimulation (day 8 after isolation), n=3. Cells were restimulated with PMA and ionomycin 8 days after initial stimulation. **(C)** Survival of B16 cells after co-culture with acutely or chronically stimulated OT-1 T cells, n=3 or n=4 as indicated. Tumor cells were pulsed with cognate peptide (SIINFEKL). **(D)** B16-ovalbumin tumor growth *in vivo* after adoptive transplant of acutely or chronically stimulated T cells, n=10 except for “No T-cells” (n=3). **(E)** Heatmap showing ATAC-seq coverage of each peak in the “Progenitor T<sub>EX</sub> peak set” for each time point in the *in vitro* exhaustion assay. Reference data from TILs is also included. **(F)** Empirical cumulative distribution of peak accessibility for peaks in the Term. T<sub>EX</sub> peak set (top) and Prog. T<sub>EX</sub> peak set (bottom) for the indicated time points *in vitro*. Reference profiles from TILs are included as indicated. **(G)** Box plots for the indicated peak sets in the *in vitro* exhaustion assay and reference TIL samples, n=3,537 Terminal T<sub>EX</sub> peaks or n=2,926 Progenitor T<sub>EX</sub> peaks. Each dot represents one peak. Box plots show 25<sup>th</sup>, 50<sup>th</sup> (median), and 75<sup>th</sup> percentiles with outliers shown as dots. For **(E-G)**, one representative replicate is shown for each sample.

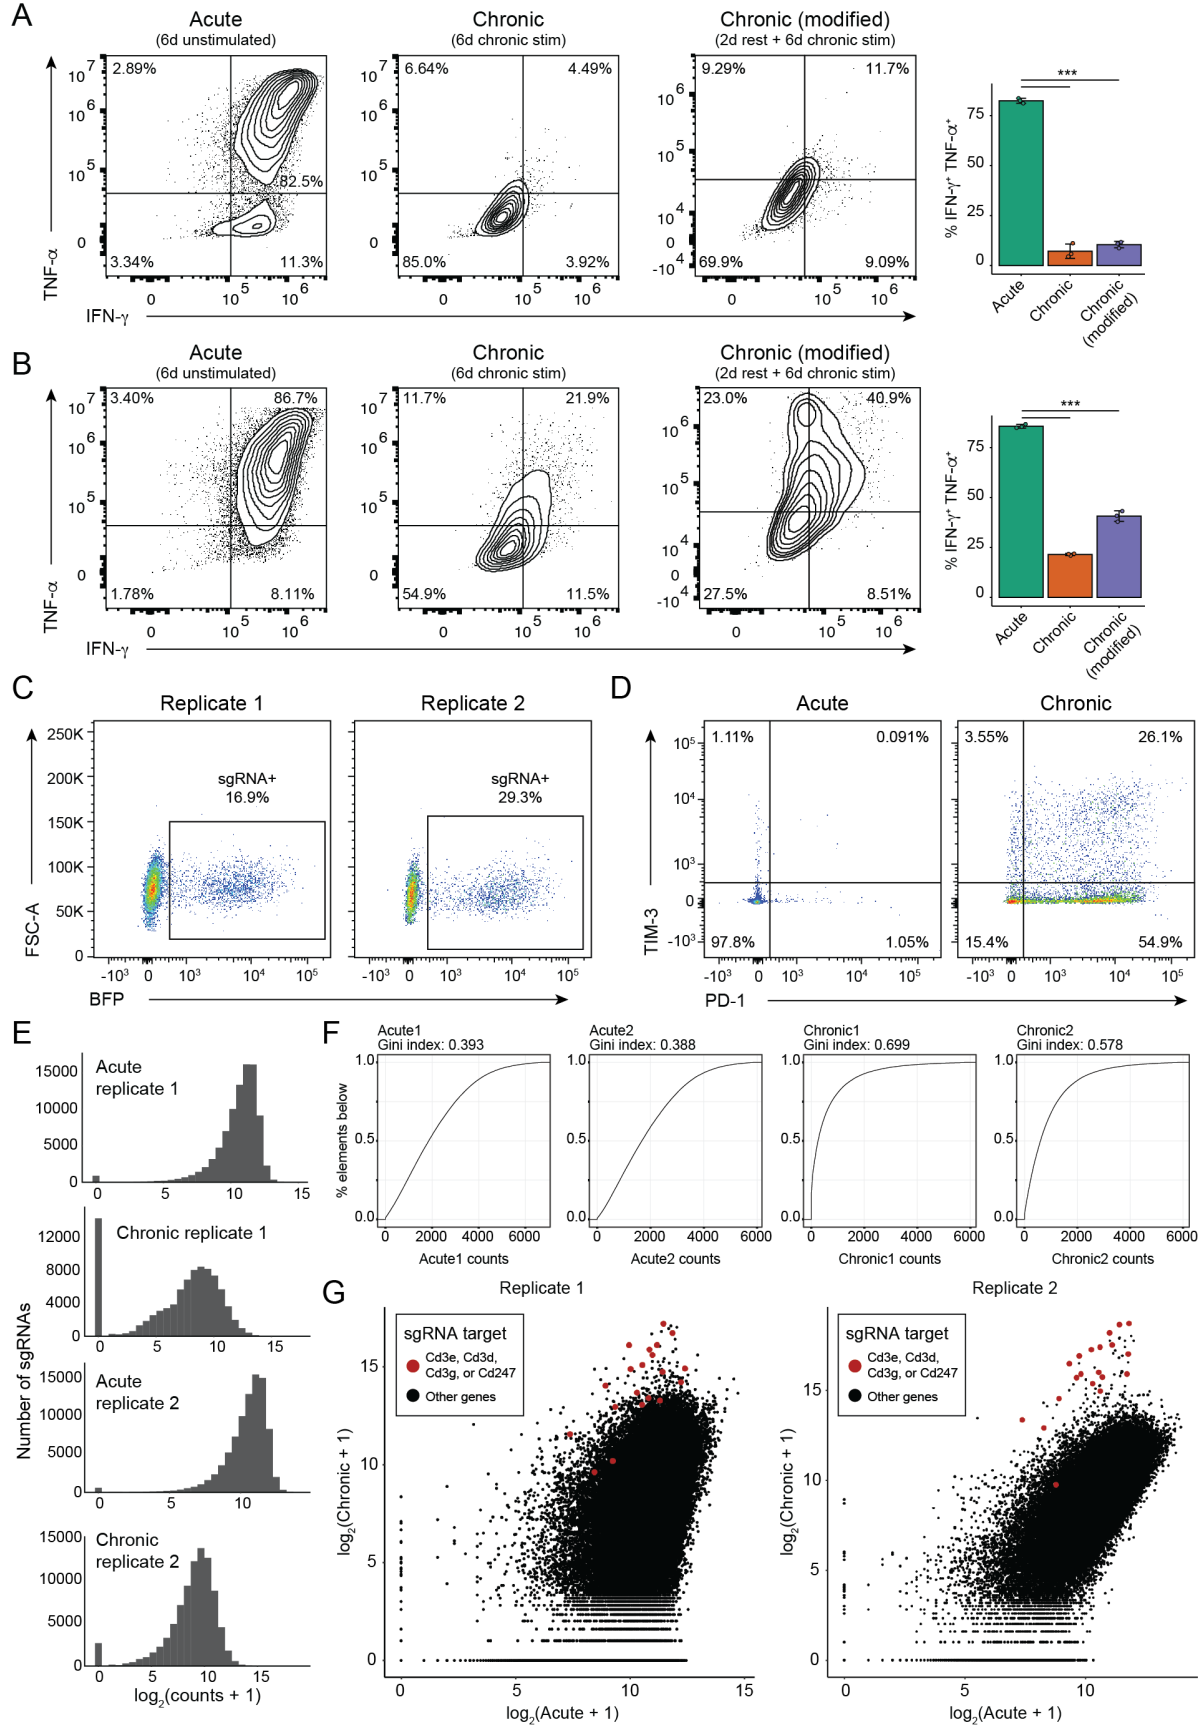

**Figure S2. Validation of assay modifications and quality control data for *in vitro* genome wide screen, related to Figure 2. (A-B)** Comparison of cytokine production after acute stimulation, chronic stimulation (6 days of anti-CD3 stimulation), or the modified chronic stimulation protocol (6 days of anti-CD3 stimulation after a 48-hour rest). **(A)** Cytokine production after anti-CD3 re-stimulation, n=3. **(B)** Cytokine production after PMA re-stimulation, n=3. **(C)** Expression of BFP on day 2 of the screen. **(D)** Surface phenotype of cells before gDNA extraction. **(E)** sgRNA representation of each sample, n=2000 sgRNAs. **(F)** Gini index and empirical cumulative distribution function shown for each sample in the genome-wide screen. **(G)** sgRNA count correlations (Acute vs Chronic) for each replicate. CD3 subunits are shown in red, all other sgRNAs in black.

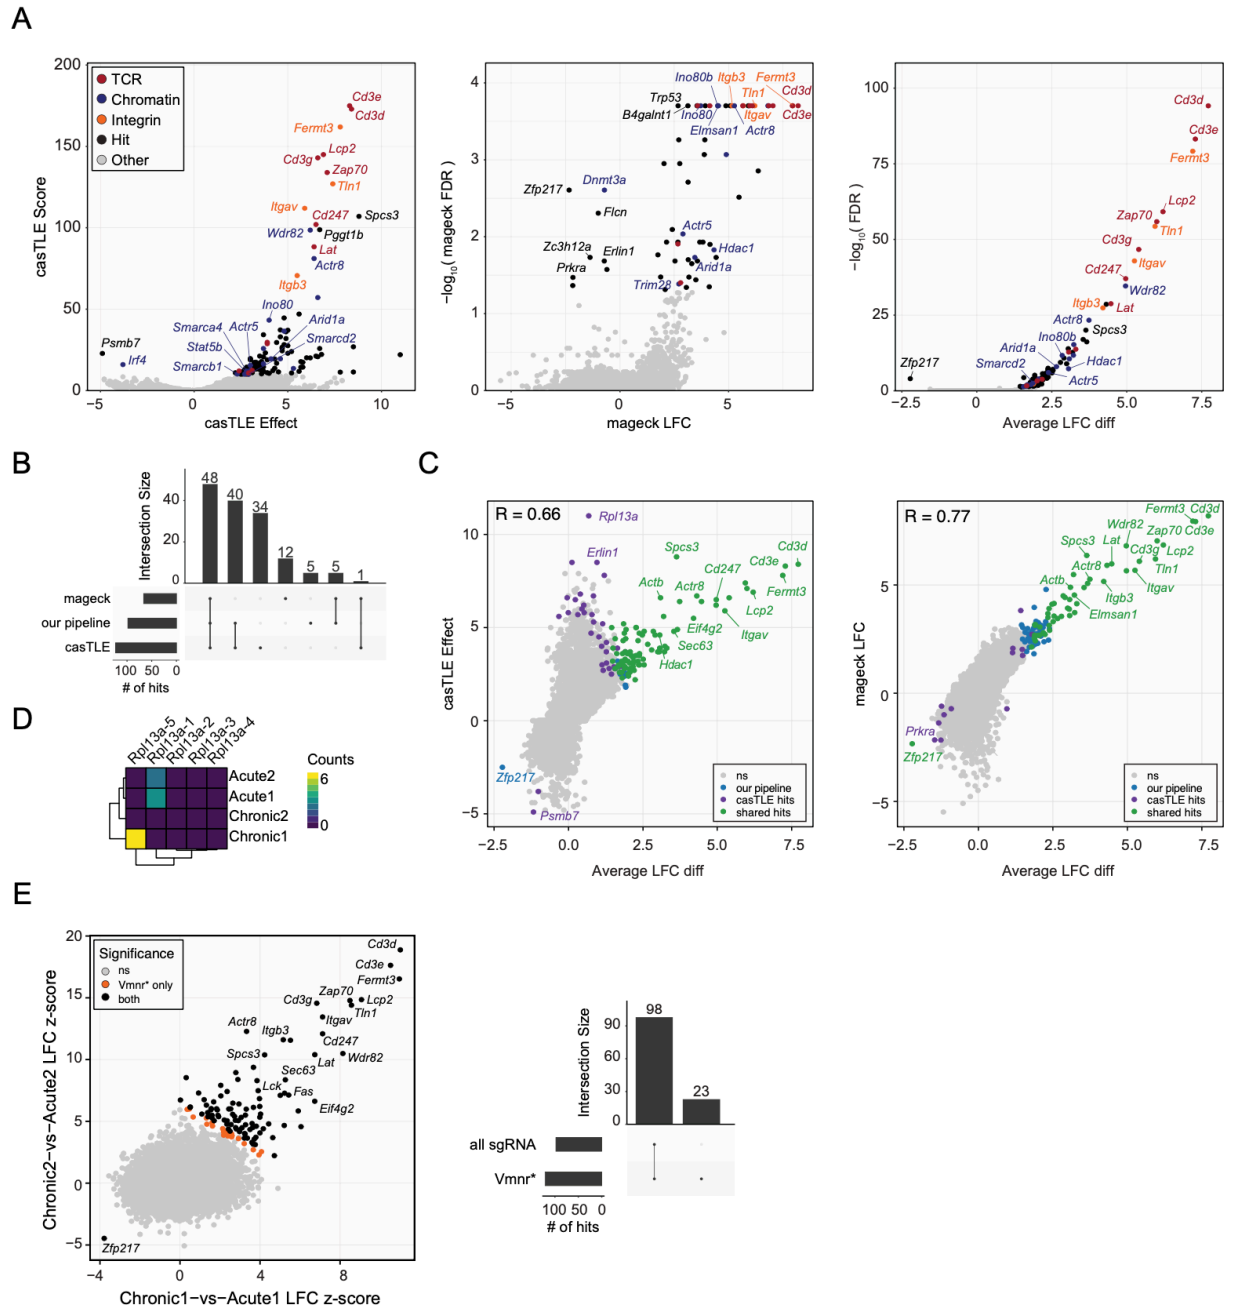

**Figure S3. Comparison of CRISPR analysis strategies, related to Figure 2. (A)** Volcano plots of genome wide CRISPR screen results using castLE (left), MAGeCK (center), and our pipeline (right). **(B)** Comparison of hit lists for each of the three pipelines. **(C)** Comparison of LFC difference computed by our pipeline to the castLE Effect (left) and MAGeCK LFC (right). **(D)** Counts table shown for *Rpl13a*. **(E)** Genome wide screen results when z-scores are computed relative to all sgRNAs or a set of olfactory receptors (*Vmnr\** genes).

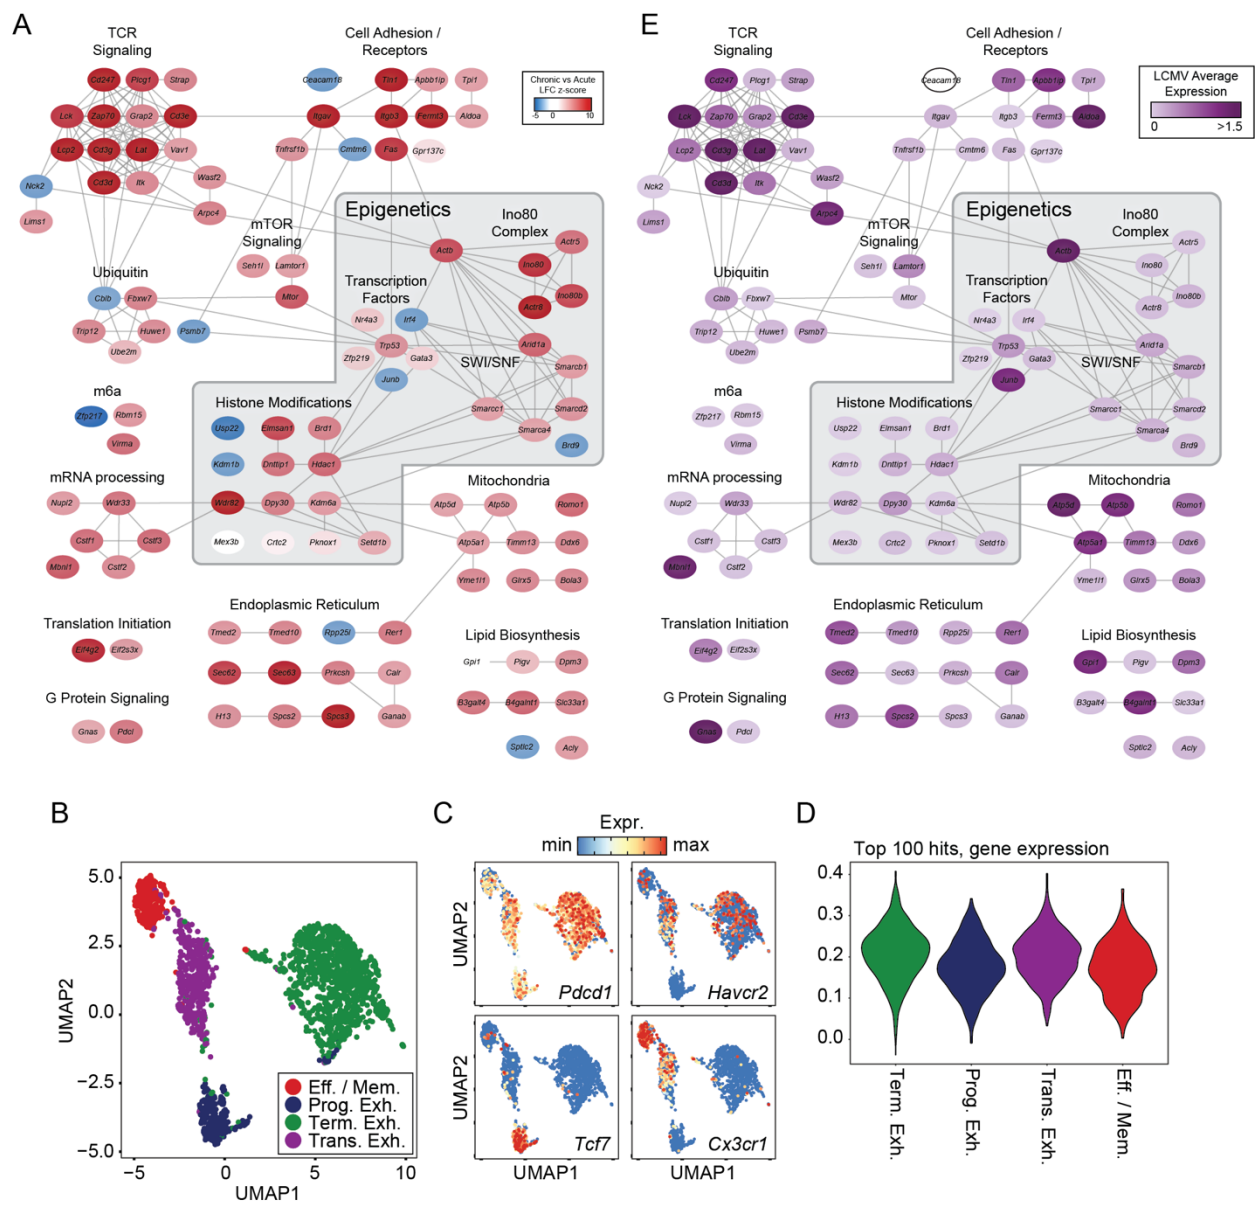

**Figure S4. Cytoscape network representation of top hits and LCMV clone 13 expression analysis, related to Figure 2. (A)** Top positive and negative hits from the genome-wide screen are shown. Each protein is represented by a node in the cytoscape network, colored by its z-score in the genome-wide screen. Nodes are connected if there is a high confidence protein-protein interaction in the string-db database (Szklarczyk et al., 2019). **(B)** Cell types identified in previously published scRNA-seq data (Raju et al., 2021). **(C)** Expression of *Pdcd1*, *Havcr2*, *Tcf7*, and *Cx3cr1* in single cells. **(D)** Expression of the gene module containing the top 100 *in vitro* hits across clusters. **(E)** Cytoscape network of top hits colored by average expression across all single cells.

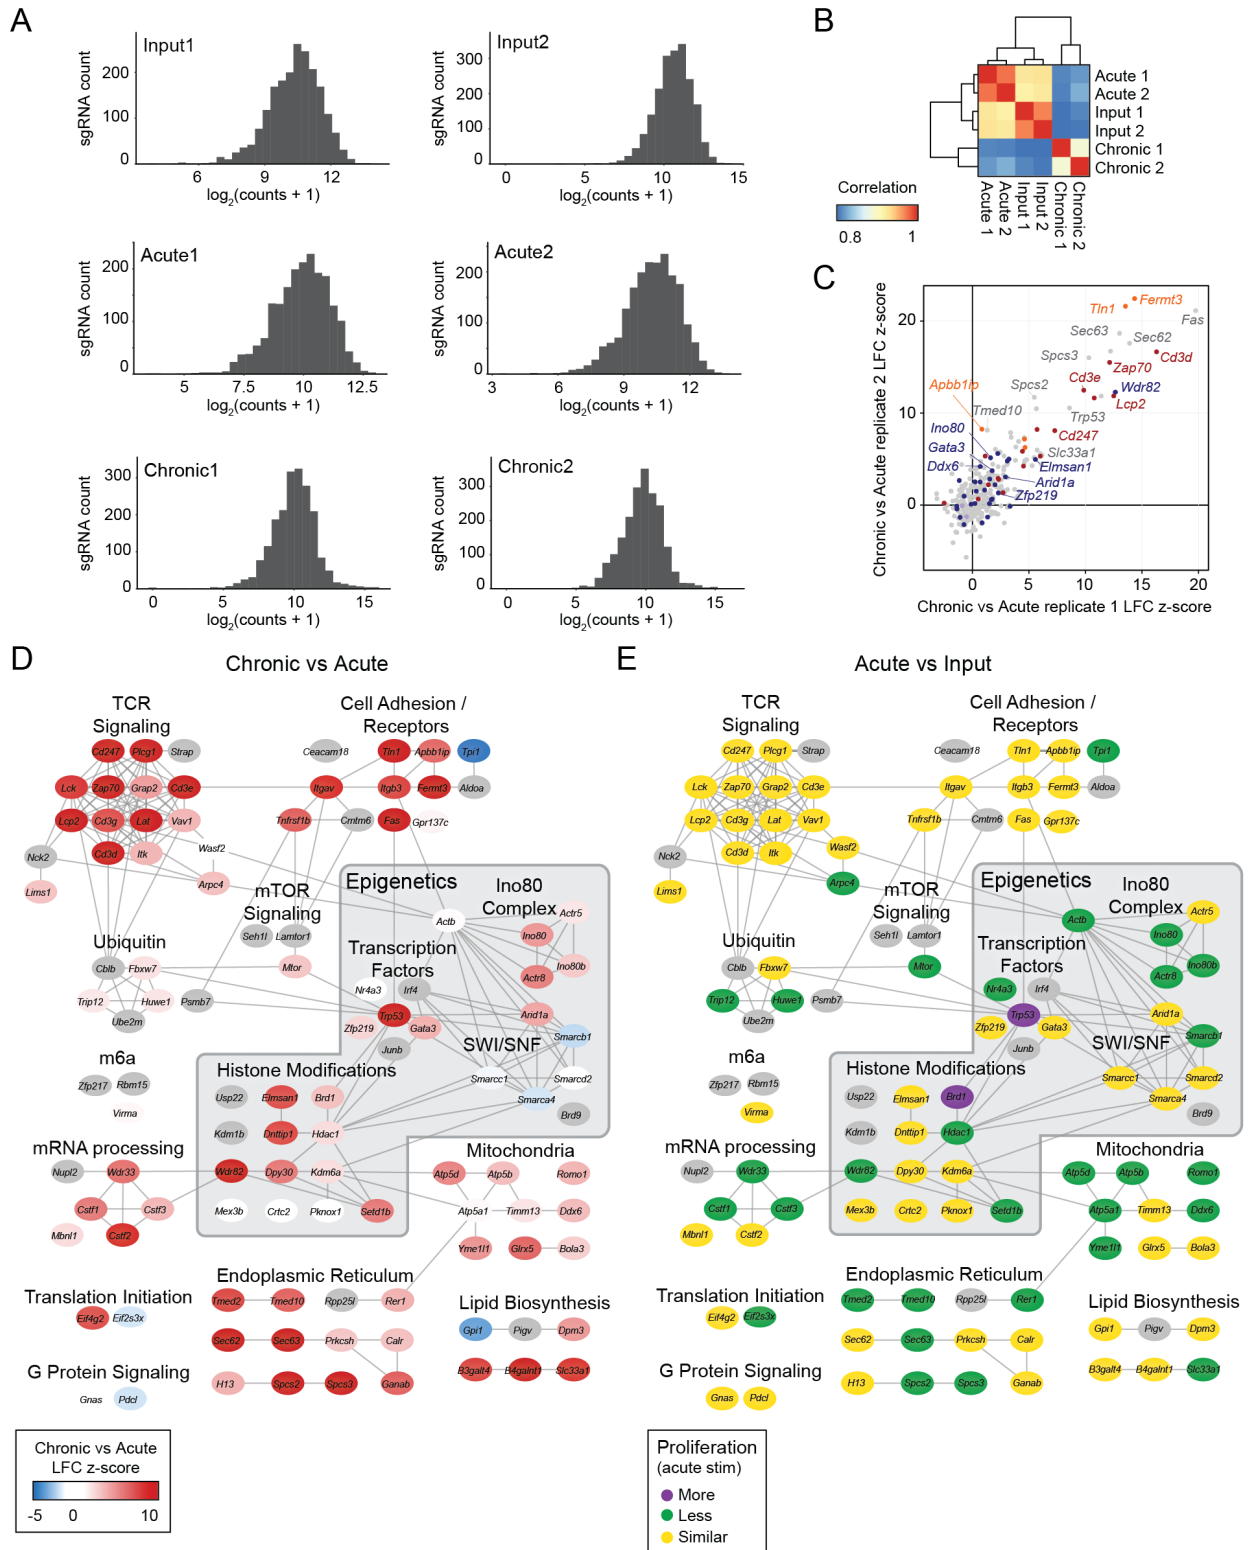

**Figure S5. Additional data for targeted *in vitro* screening, related to Figure 2. (A)** sgRNA representation of each sample in the *in vitro* mini-pool screen. **(B)** Correlation of the sgRNA counts of each sample in the mini-pool screen. **(C)** Correlation of the Chronic vs Acute replicate z-scores,  $n=2$ . **(D)**

Cytoscape interaction network with genes colored by their z-score in the Chronic vs Acute mini-pool screen.  
**(E)** Cytoscape interaction network with genes colored by their fitness categorization in acute stimulation.



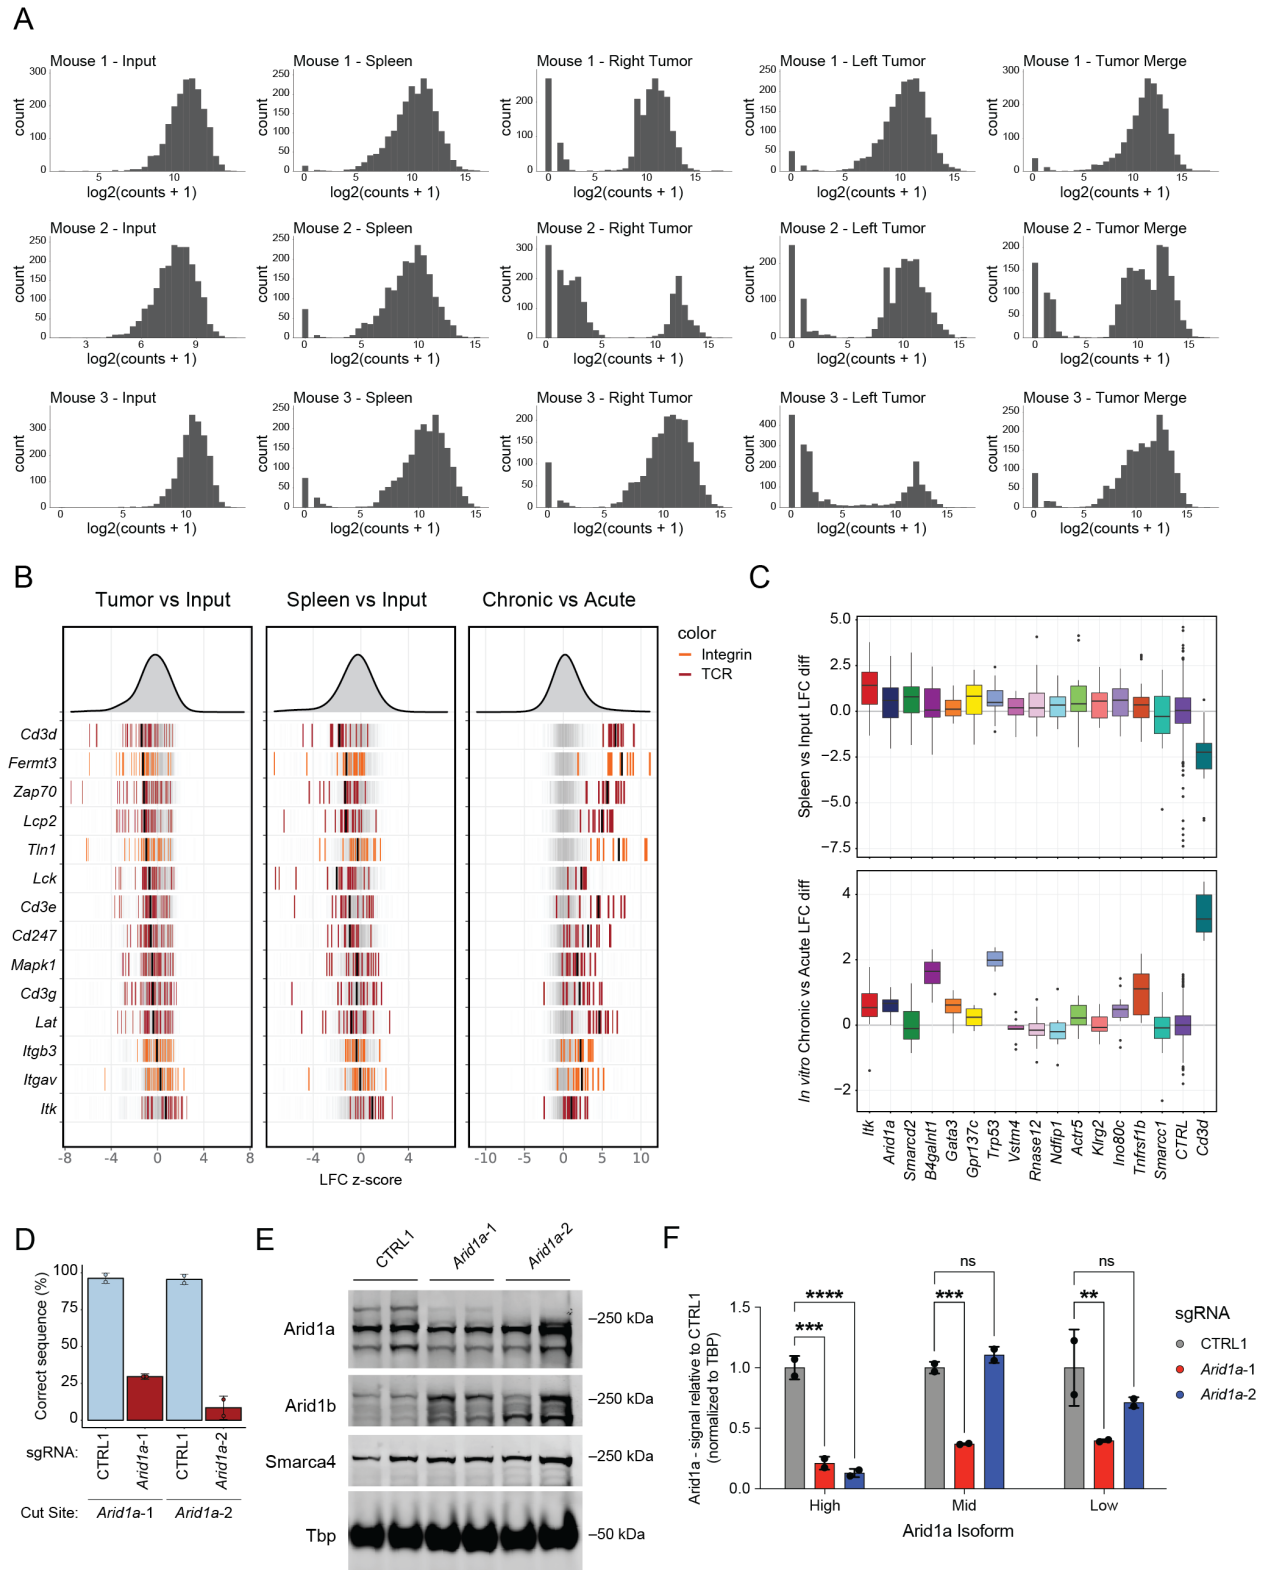

*in vitro* mini-pool Chronic vs Acute (n=12 sgRNA-replicates) for selected genes in the “TCR signaling” and “Integrin signaling” categories. **(C)** Boxplot of spleen vs input (n=18 except for CTRL (n=600)) and acute vs chronic (n=12 except for CTRL (n=400)) log fold change for each sgRNA targeting the indicated gene, with the mean control log fold change subtracted. Box plots show 25<sup>th</sup>, 50<sup>th</sup> (median), and 75<sup>th</sup> percentiles with outliers shown as dots. **(D)** Sanger sequencing (TIDE) analysis of editing efficiency of *Arid1a* sgRNAs, n=2 replicates per sgRNA. Error bars denote mean  $\pm$  SD. **(E)** Western blot analysis of protein knockdown for *Arid1a* sgRNAs, as well as *Arid1b* and *Smarca4* expression. **(F)** Quantification of protein knockdown for each identified isoform of *Arid1a* (panel C three bands), n=2. \* p < 0.05, \*\* p < 0.01, \*\*\* p < 0.001, \*\*\*\* p < 0.0001.

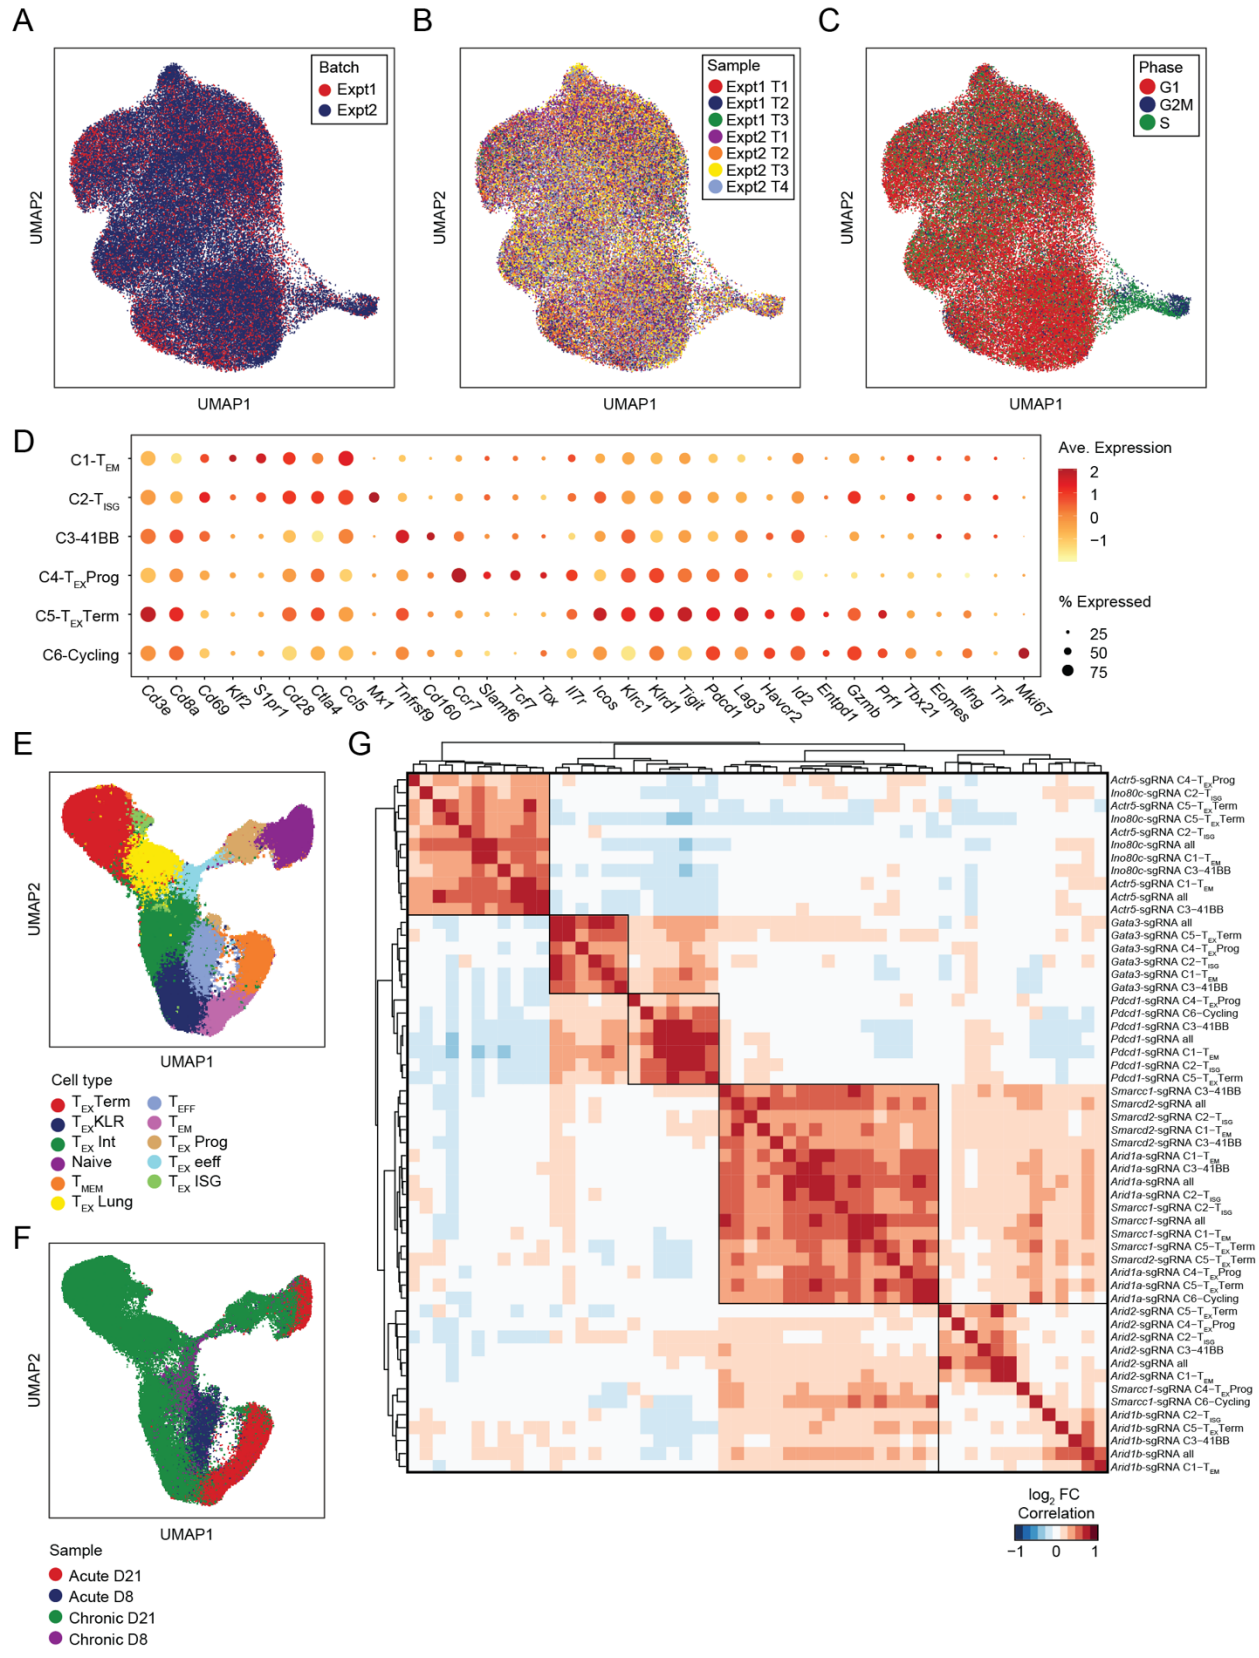

**Figure S7. Additional data on the *in vivo* Perturb-seq experiment, related to Figure 6. (A)** scRNA-seq profiles of TILs colored by each independent experiment (n=2 independent experiments). **(B)** scRNA-seq profiles of TILs colored by each sample (n=7 replicates). **(C)** scRNA-seq profiles of TILs colored by predicted phase of the cell cycle. **(D)** Additional marker genes shown for each cluster. **(E)** Expanded reference LCMV dataset with single cell profiles colored by LCMV cluster. Data from (Daniel et al., 2021). **(F)** Expanded LCMV dataset with single cell profiles colored by LCMV infection (Acute corresponds to Armstrong infection while Chronic corresponds to Clone 13) and time point (Day 8 or Day 21 post infection). **(G)** Heatmap of the correlation of gene expression differences subsetted on each cluster. The indicated gene knockdown was compared to CTRL1 cells within each cluster. Comparisons with <150 cells in the comparison groups are excluded due to lack of statistical power.

**A**

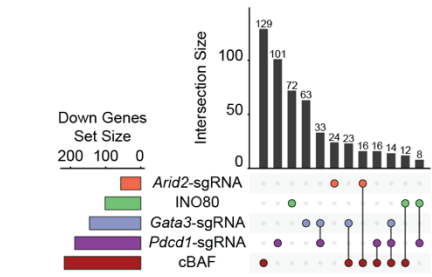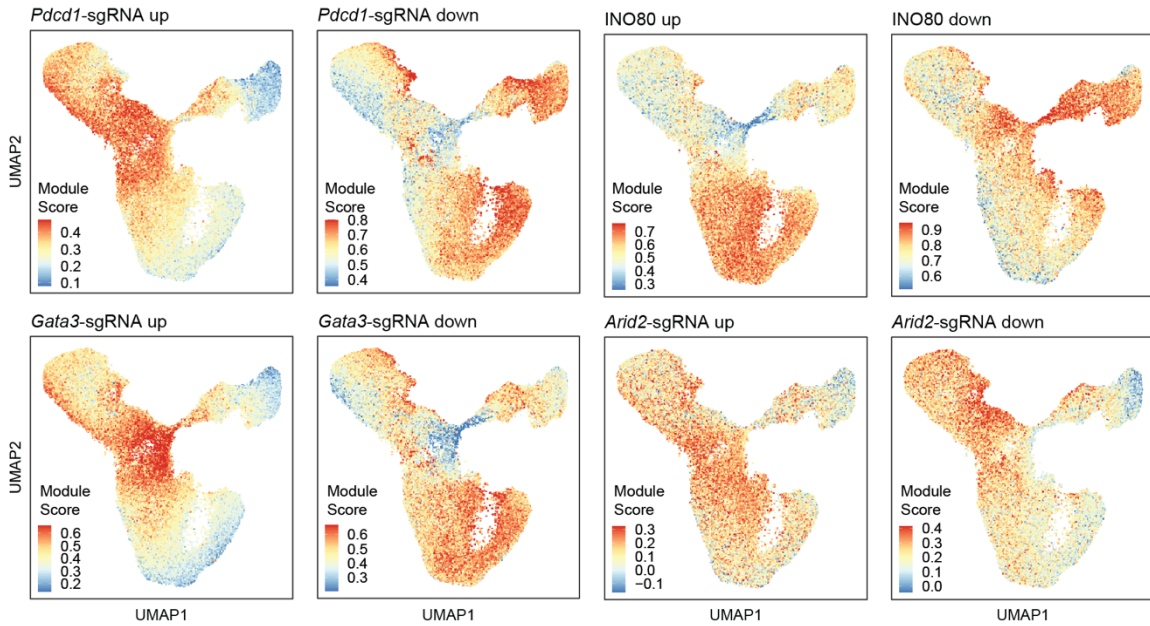

**C**

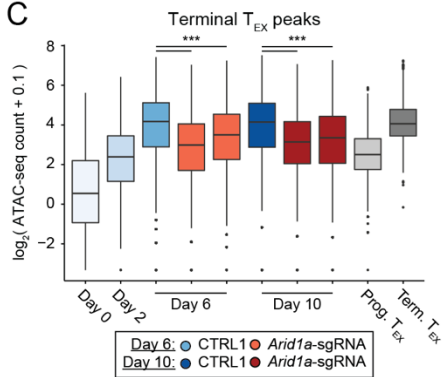

**E**

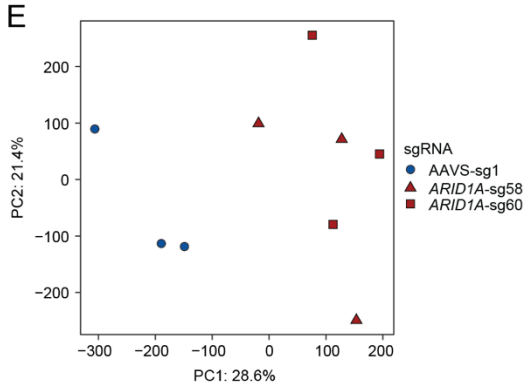

**B**

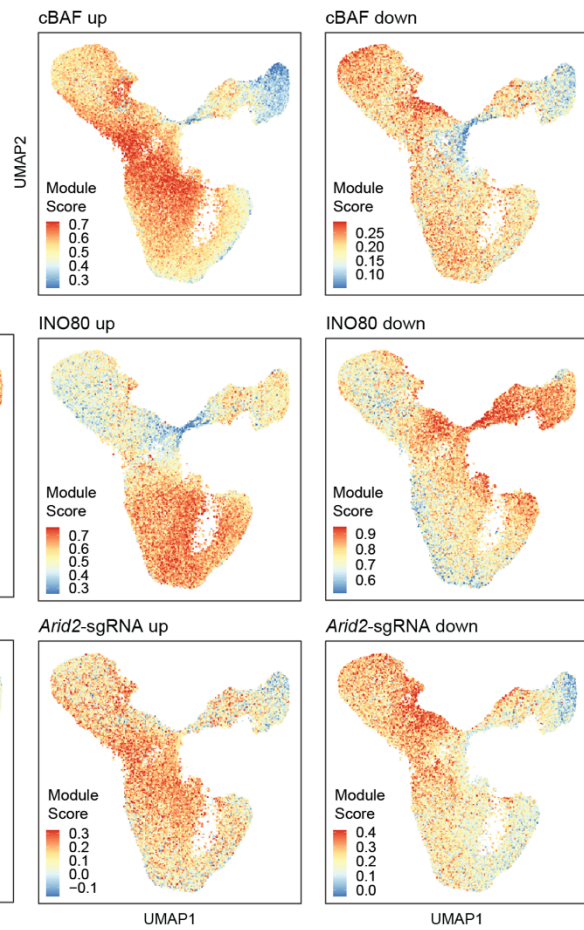

**D**

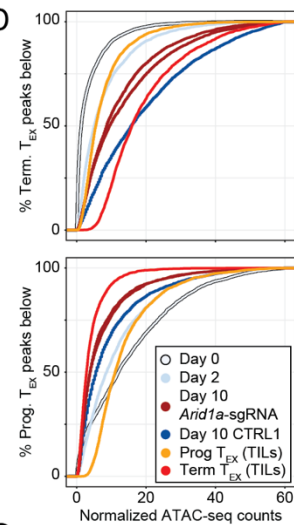

**G**

Motifs in AAVS "up" peaks (7,417)

| Motif | P value |
|-------|---------|
| AP-1  | 1e-498  |
| Fos   | 1e-497  |
| JunB  | 1e-471  |

**F**

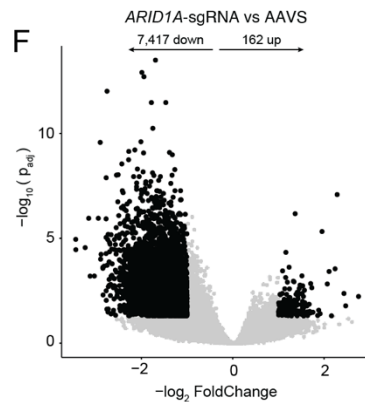

**Figure S8. Additional data on up- and downregulated gene sets and additional ATAC-seq data, related to Figures 7 and 8. (A)** Comparison of gene sets downregulated by perturbation of cBAF subunits, INO80 subunits, or *Pdcd1*-sgRNA, *Gata3*-sgRNA, or *Arid2*-sgRNA. **(B)** Module scores of the indicated gene sets computed for each cell in the expanded LCMV reference dataset. **(C)** Box plots for the indicated peak sets in the *in vitro* exhaustion assay and reference TIL samples. Each dot represents one peak, n=3,537 Terminal T<sub>EX</sub> peaks or n=2,926 Progenitor T<sub>EX</sub> peaks. Box plots show 25<sup>th</sup>, 50<sup>th</sup> (median), and 75<sup>th</sup> percentiles with outliers shown as dots. Significance determined by Wilcoxon test, \*\*\* p < 0.001. **(D)** Empirical cumulative distribution of peak accessibility for peaks in the Term. T<sub>EX</sub> peak set (top) and Prog. T<sub>EX</sub> peak set (bottom) for the indicated samples *in vitro*. Reference profiles from TILs are included as indicated. **(E)** Principal component analysis of ATAC-seq data of primary human T cells chronically stimulated for six days, n=3 per sgRNA. **(F)** Differential peaks between *ARID1A*-sgRNA and AAVS primary human T cells. **(G)** HOMER analysis of TF motifs enriched in AAVS 'up' peaks. Selected highly ranked motifs are shown. Results in **(E-G)** are merged from three different human donors in two independent experiments with two different *ARID1A* targeting sgRNAs per donor.
